# Supplementary material
Source: PubMed Central journal article supplement (PMC7175466)
Supplement: NEJMc2009409_disclosures.pdf [file NEJMc2009409_disclosures.pdf]

# Mark Henry

**Disclosure Purpose:** 20-09409

## Summary of Financial Interests

I do not have any financial interests to disclose at this time.

## Additional Information:

- 1. Are there other relationships or activities that readers could perceive to have influenced, or that give the appearance of potentially influencing, what you wrote in the submitted work?**  
No.
- 2. What is the manuscript title?**  
Covid19: Dispatches from the Front: Staying ahead of the wave.
- 3. Are you the corresponding author?**  
No.

## Certification

I certify that the information provided in this disclosure is complete and accurate.

# Eric Morley

**Disclosure Purpose:** 20-09409

## Summary of Financial Interests

I do not have any financial interests to disclose at this time.

## Additional Information:

- 1. Are there other relationships or activities that readers could perceive to have influenced, or that give the appearance of potentially influencing, what you wrote in the submitted work?**  
No.
- 2. What is the manuscript title?**  
Covid19: Dispatches from the Front: Staying ahead of the wave.
- 3. Are you the corresponding author?**  
No.

## Certification

I certify that the information provided in this disclosure is complete and accurate.

# Adam Singer

**Disclosure Purpose:** 20-09409

## Summary of Financial Interests

I do not have any financial interests to disclose at this time.

## Additional Information:

1. **Are there other relationships or activities that readers could perceive to have influenced, or that give the appearance of potentially influencing, what you wrote in the submitted work?**

No.

2. **What is the manuscript title?**

Covid19: Dispatches from the Front: Staying ahead of the wave.

3. **Are you the corresponding author?**

Yes.

- a. **Please list the other authors' names here.**

Eric J Morley, MD; Mark C Henry, MD

## Certification

I certify that the information provided in this disclosure is complete and accurate.
